# Supplementary material for: Highly Pathogenic Avian Influenza H5N1 Virus Infections in Wild Red Foxes (Vulpes vulpes) Show Neurotropism and Adaptive Virus Mutations
Source: PubMed Central journal article supplement (PMC9927208; doi:10.1128/spectrum.02867-22), 2023-01-23
Supplement: spectrum.02867-22-s0001.pdf [file spectrum.02867-22-s0001.pdf]

**Table S1: Immunohistochemistry and histopathology.<sup>a</sup>**

|                                                                       | <b>Fox- Dorst</b>                                                                                      | <b>Fox-Heemskerk</b>                                                                                                        | <b>Fox -Oosterbeek</b>                                                                                                       |
|-----------------------------------------------------------------------|--------------------------------------------------------------------------------------------------------|-----------------------------------------------------------------------------------------------------------------------------|------------------------------------------------------------------------------------------------------------------------------|
| <b>Immunohistochemistry (IHC)-viral protein expression</b>            |                                                                                                        |                                                                                                                             |                                                                                                                              |
| <b>Nasal conchae</b>                                                  | na                                                                                                     | Positive, mild staining<br>mainly in olfactory<br>epithelium                                                                | N                                                                                                                            |
| <b>Trachea</b>                                                        | N                                                                                                      | N                                                                                                                           | N                                                                                                                            |
| <b>Lung</b>                                                           | N                                                                                                      | N                                                                                                                           | N                                                                                                                            |
| <b>Heart</b>                                                          | na                                                                                                     | Positive, mild staining of<br>cardiomyocytes                                                                                | N                                                                                                                            |
| <b>Liver</b>                                                          | N                                                                                                      | N                                                                                                                           | N                                                                                                                            |
| <b>Kidney</b>                                                         | N                                                                                                      | N                                                                                                                           | N                                                                                                                            |
| <b>Spleen</b>                                                         | N                                                                                                      | N                                                                                                                           | N                                                                                                                            |
| <b>Stomach/Intestine<br/>(colon/jejunum)</b>                          | N                                                                                                      | N                                                                                                                           | N                                                                                                                            |
| <b>Brain</b>                                                          | Mild to moderate<br>positive staining in<br>cerebrum, cerebellum<br>negative, bulbus<br>olfactorius na | Mild to moderate<br>positive staining in<br>cerebrum and<br>cerebellum, bulbus<br>olfactorius negative                      | Mild to moderate staining<br>in cerebrum, cerebellum<br>and bulbus olfactorius are<br>negative                               |
| <b>Hematoxylin and eosin (HE)- evaluation histopathologic changes</b> |                                                                                                        |                                                                                                                             |                                                                                                                              |
| <b>Nasal conchae</b>                                                  | na                                                                                                     | Mild to moderate<br>necropurulent rhinitis<br>with intraluminal eggs<br>and larvae (most likely<br><i>Capillaria spp.</i> ) | Mild to moderate<br>necropurulent rhinitis with<br>intraluminal eggs and larvae<br>(most likely <i>Capillaria<br/>spp.</i> ) |

|                                          |                                                                                                                |                                                                              |                                                                                                                                             |
|------------------------------------------|----------------------------------------------------------------------------------------------------------------|------------------------------------------------------------------------------|---------------------------------------------------------------------------------------------------------------------------------------------|
| <b>Trachea</b>                           | Severe necropurulent tracheitis with intralesional parasite eggs ( most likely <i>Capillaria</i> spp)          | Mild purulent (suppurative) tracheitis                                       | nsc                                                                                                                                         |
| <b>Lung</b>                              | Severe purulent broncho-interstitial pneumonia with lung larvae ( <i>most likely Angiostrongylus vasorum</i> ) | Moderate subacute broncho-interstitial pneumonia with hemorrhage and fibrin  | Severe bronchointerstitial pneumonia with intralesional larvae (most likely <i>Angiostrongylus vasorum</i> ) and multinucleated giant cells |
| <b>Heart</b>                             | na                                                                                                             | Lymphoplasmacytic myocarditis with mild myocardial degeneration and necrosis | nsc                                                                                                                                         |
| <b>Liver</b>                             | nsc                                                                                                            | nsc                                                                          | nsc                                                                                                                                         |
| <b>Kidney</b>                            | nsc                                                                                                            | nsc                                                                          | Chronic moderate lymphoplasmacytic interstitial nephritis                                                                                   |
| <b>Spleen</b>                            | nsc                                                                                                            | nsc                                                                          | nsc                                                                                                                                         |
| <b>Stomach/Intestine (colon/jejunum)</b> | nsc                                                                                                            | nsc                                                                          | nsc                                                                                                                                         |
| <b>Brain</b>                             | Moderate non-suppurative encephalitis                                                                          | Moderate non-suppurative encephalitis                                        | Moderate non-suppurative encephalitis                                                                                                       |

<sup>a</sup> N: negative, na: not analyzed, nsc: no significant changes

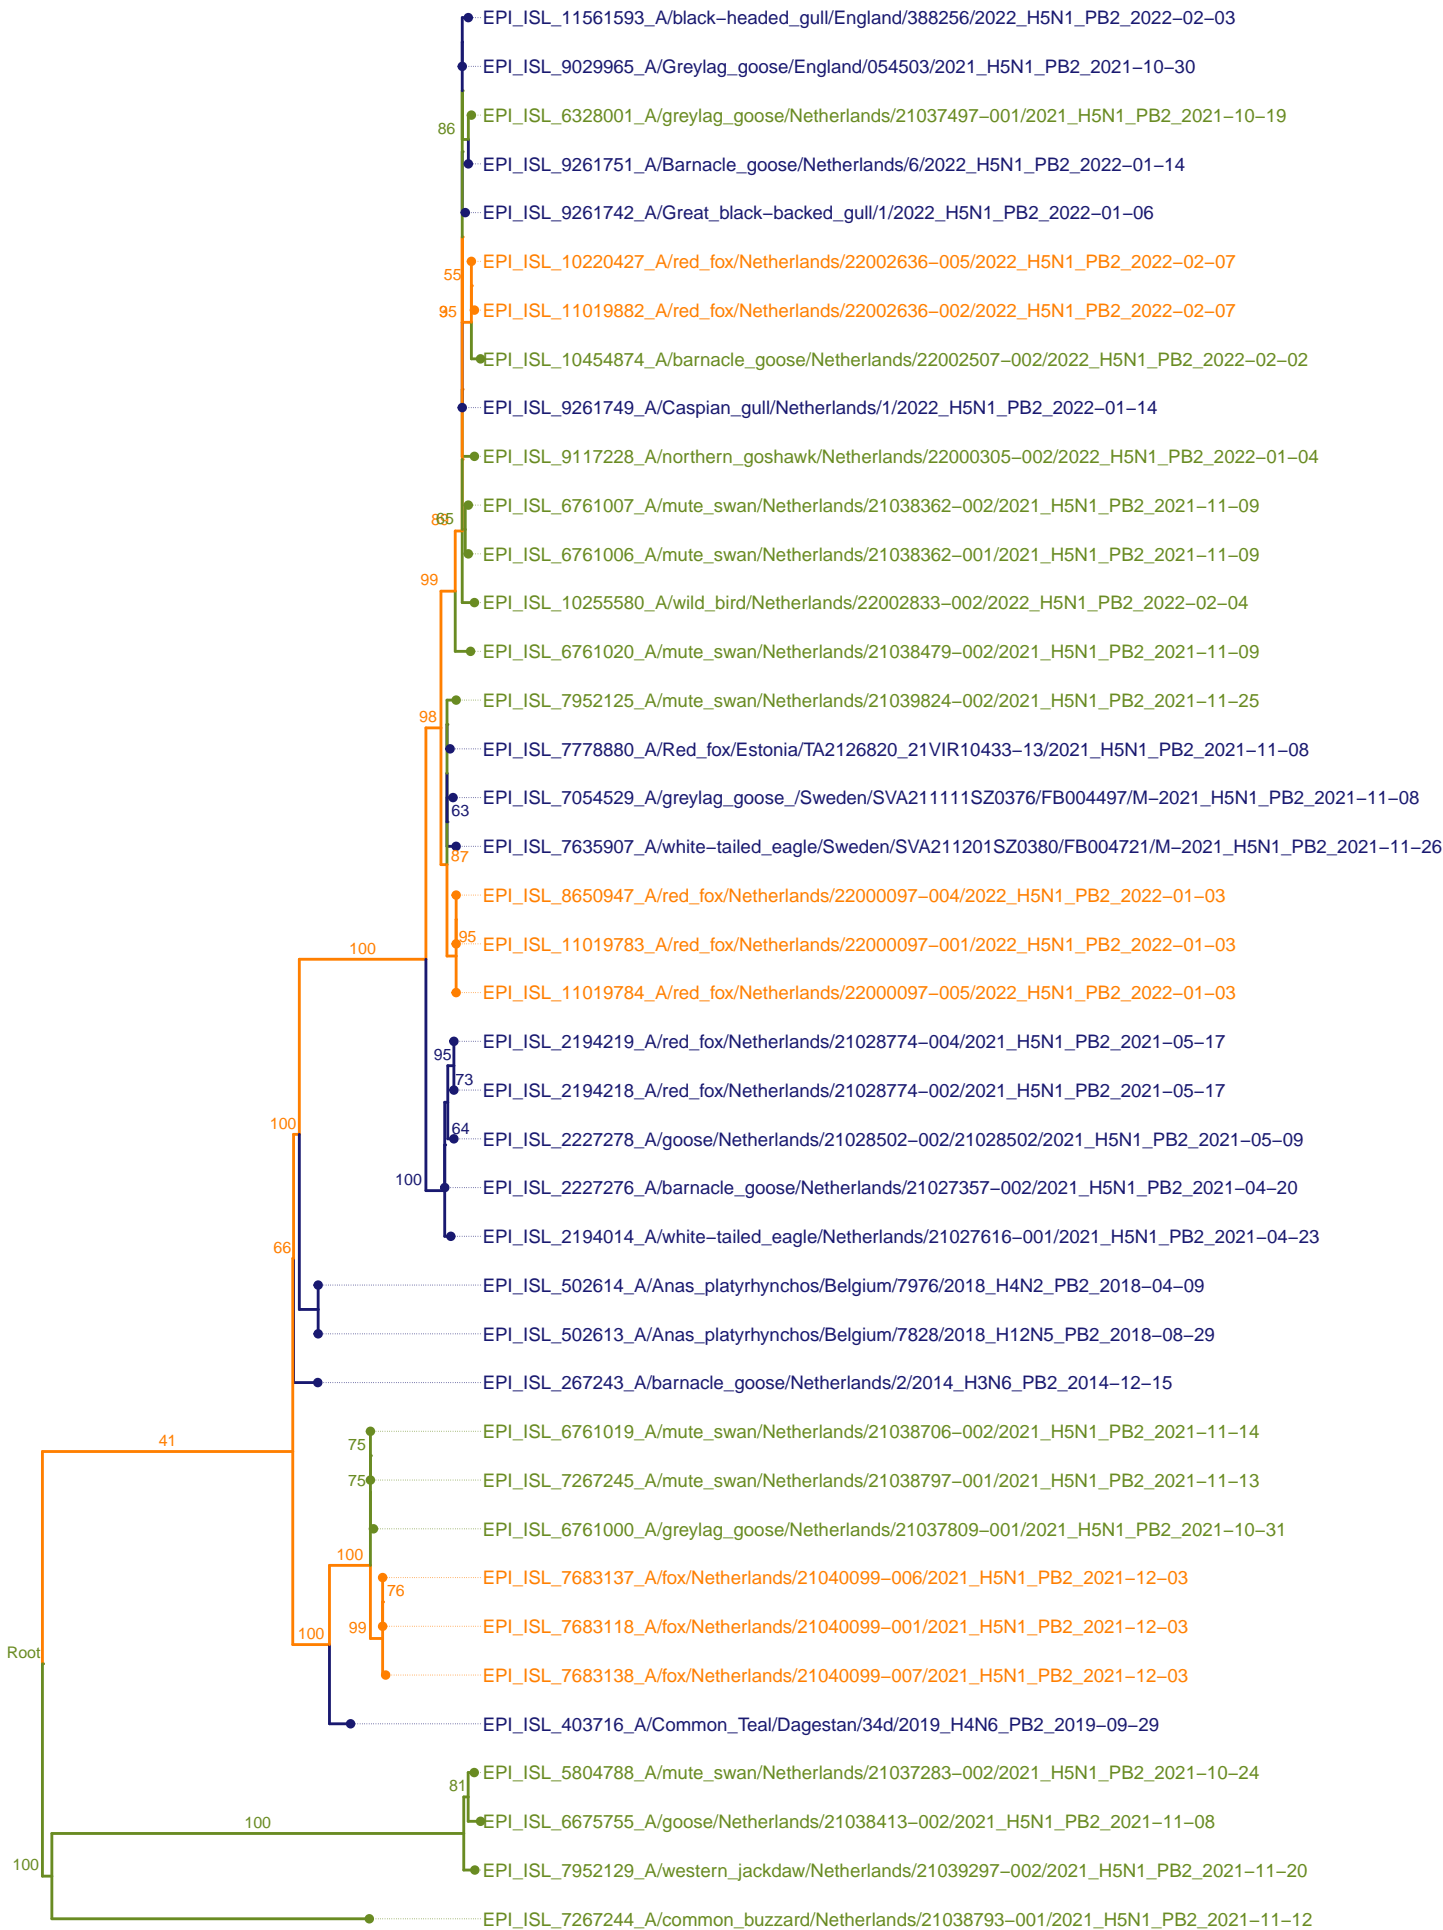

0.006

# PB1

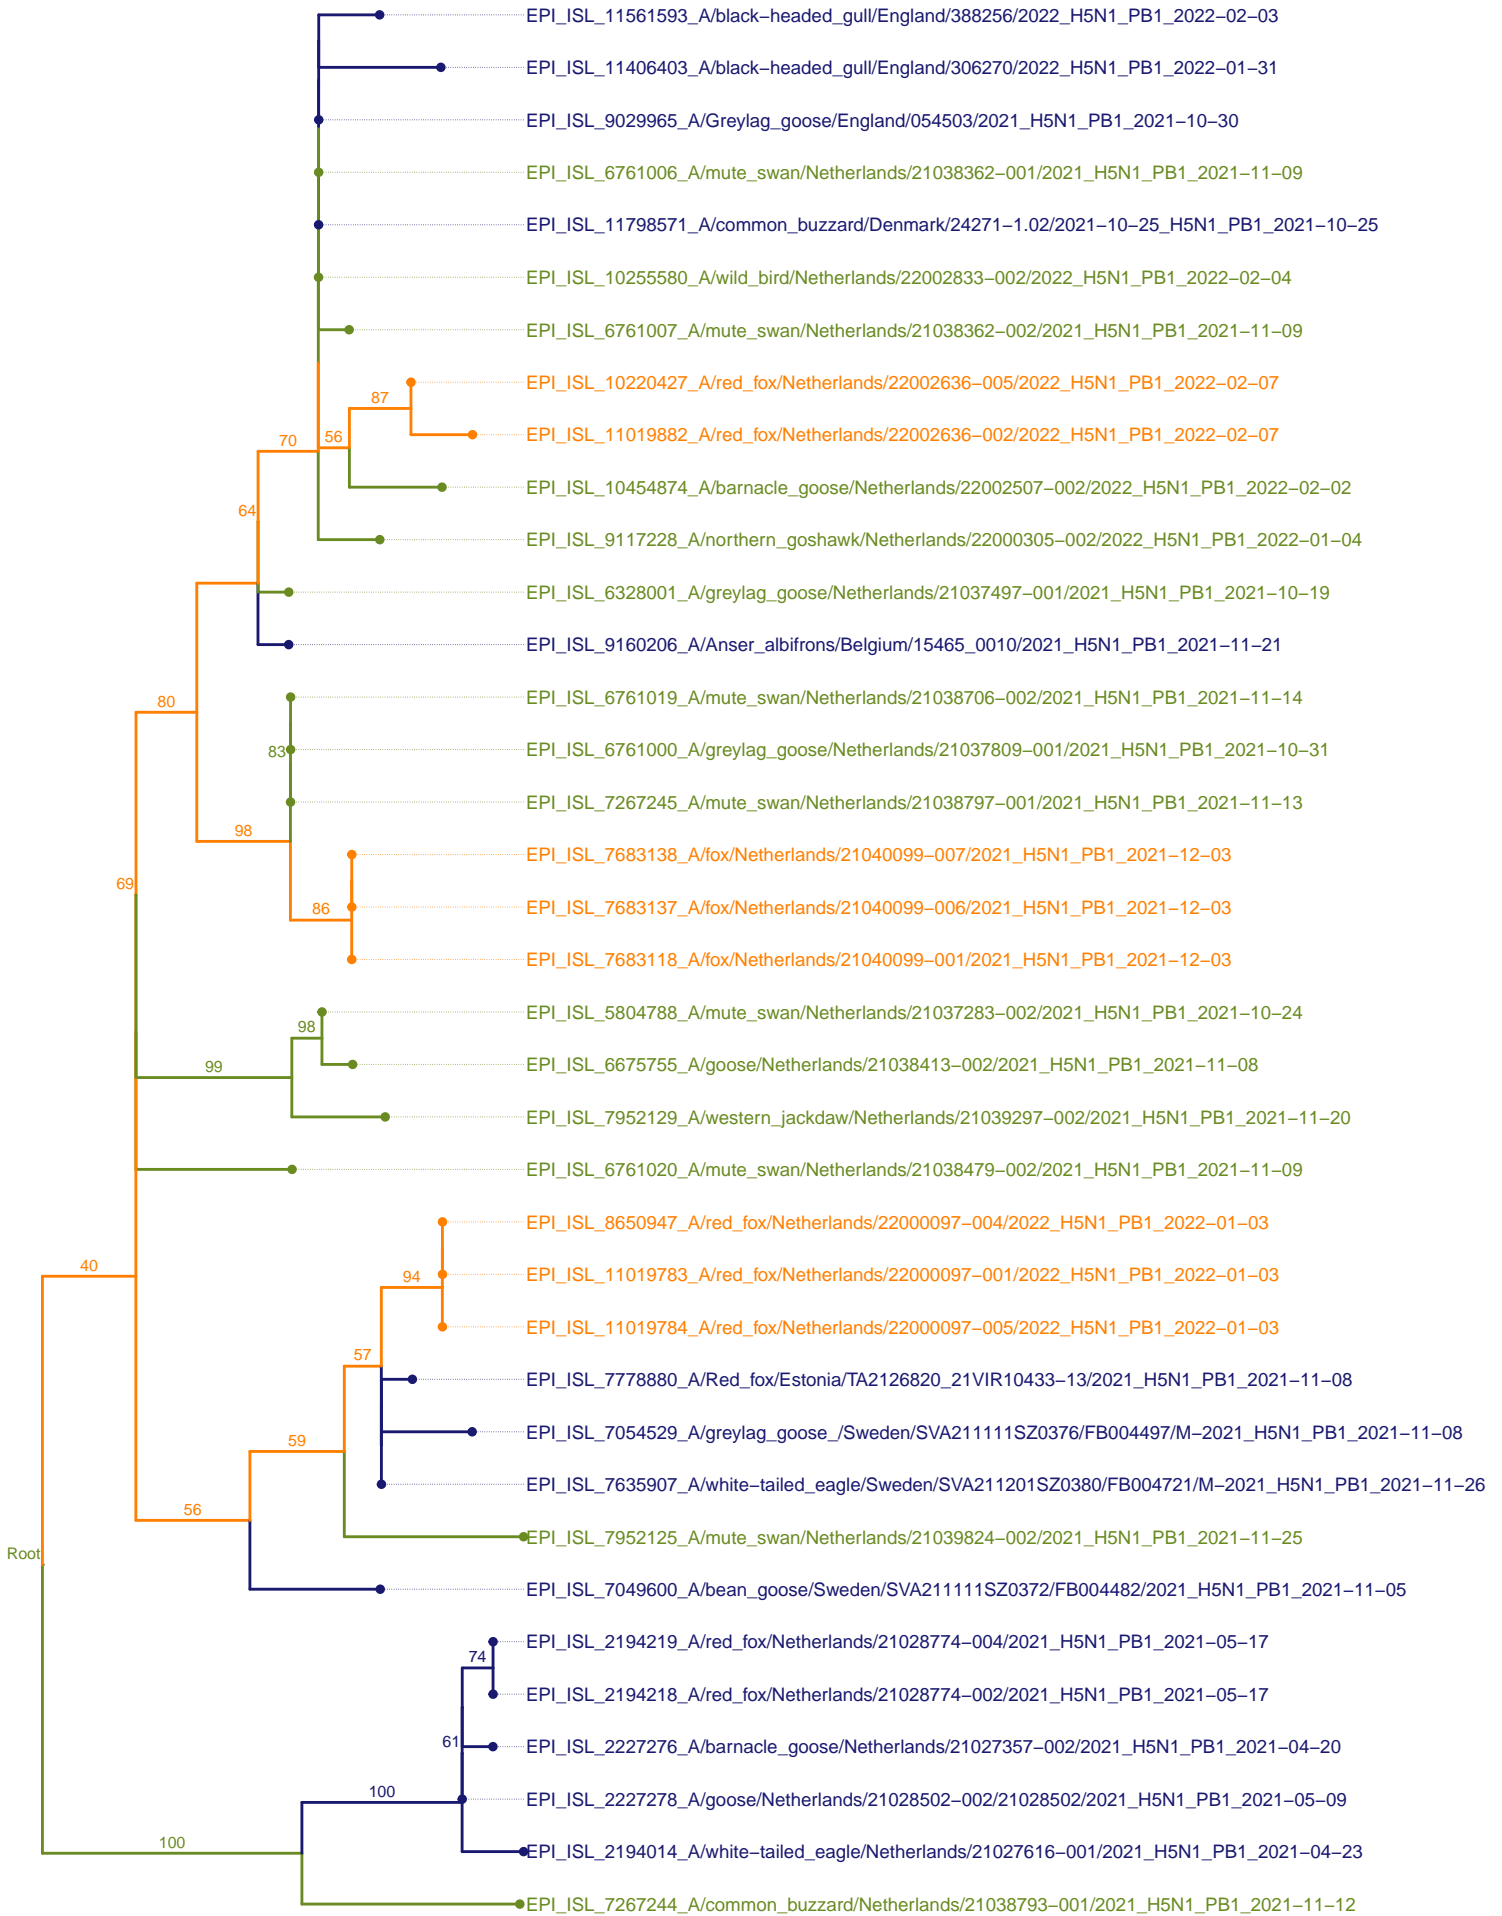

0.0006

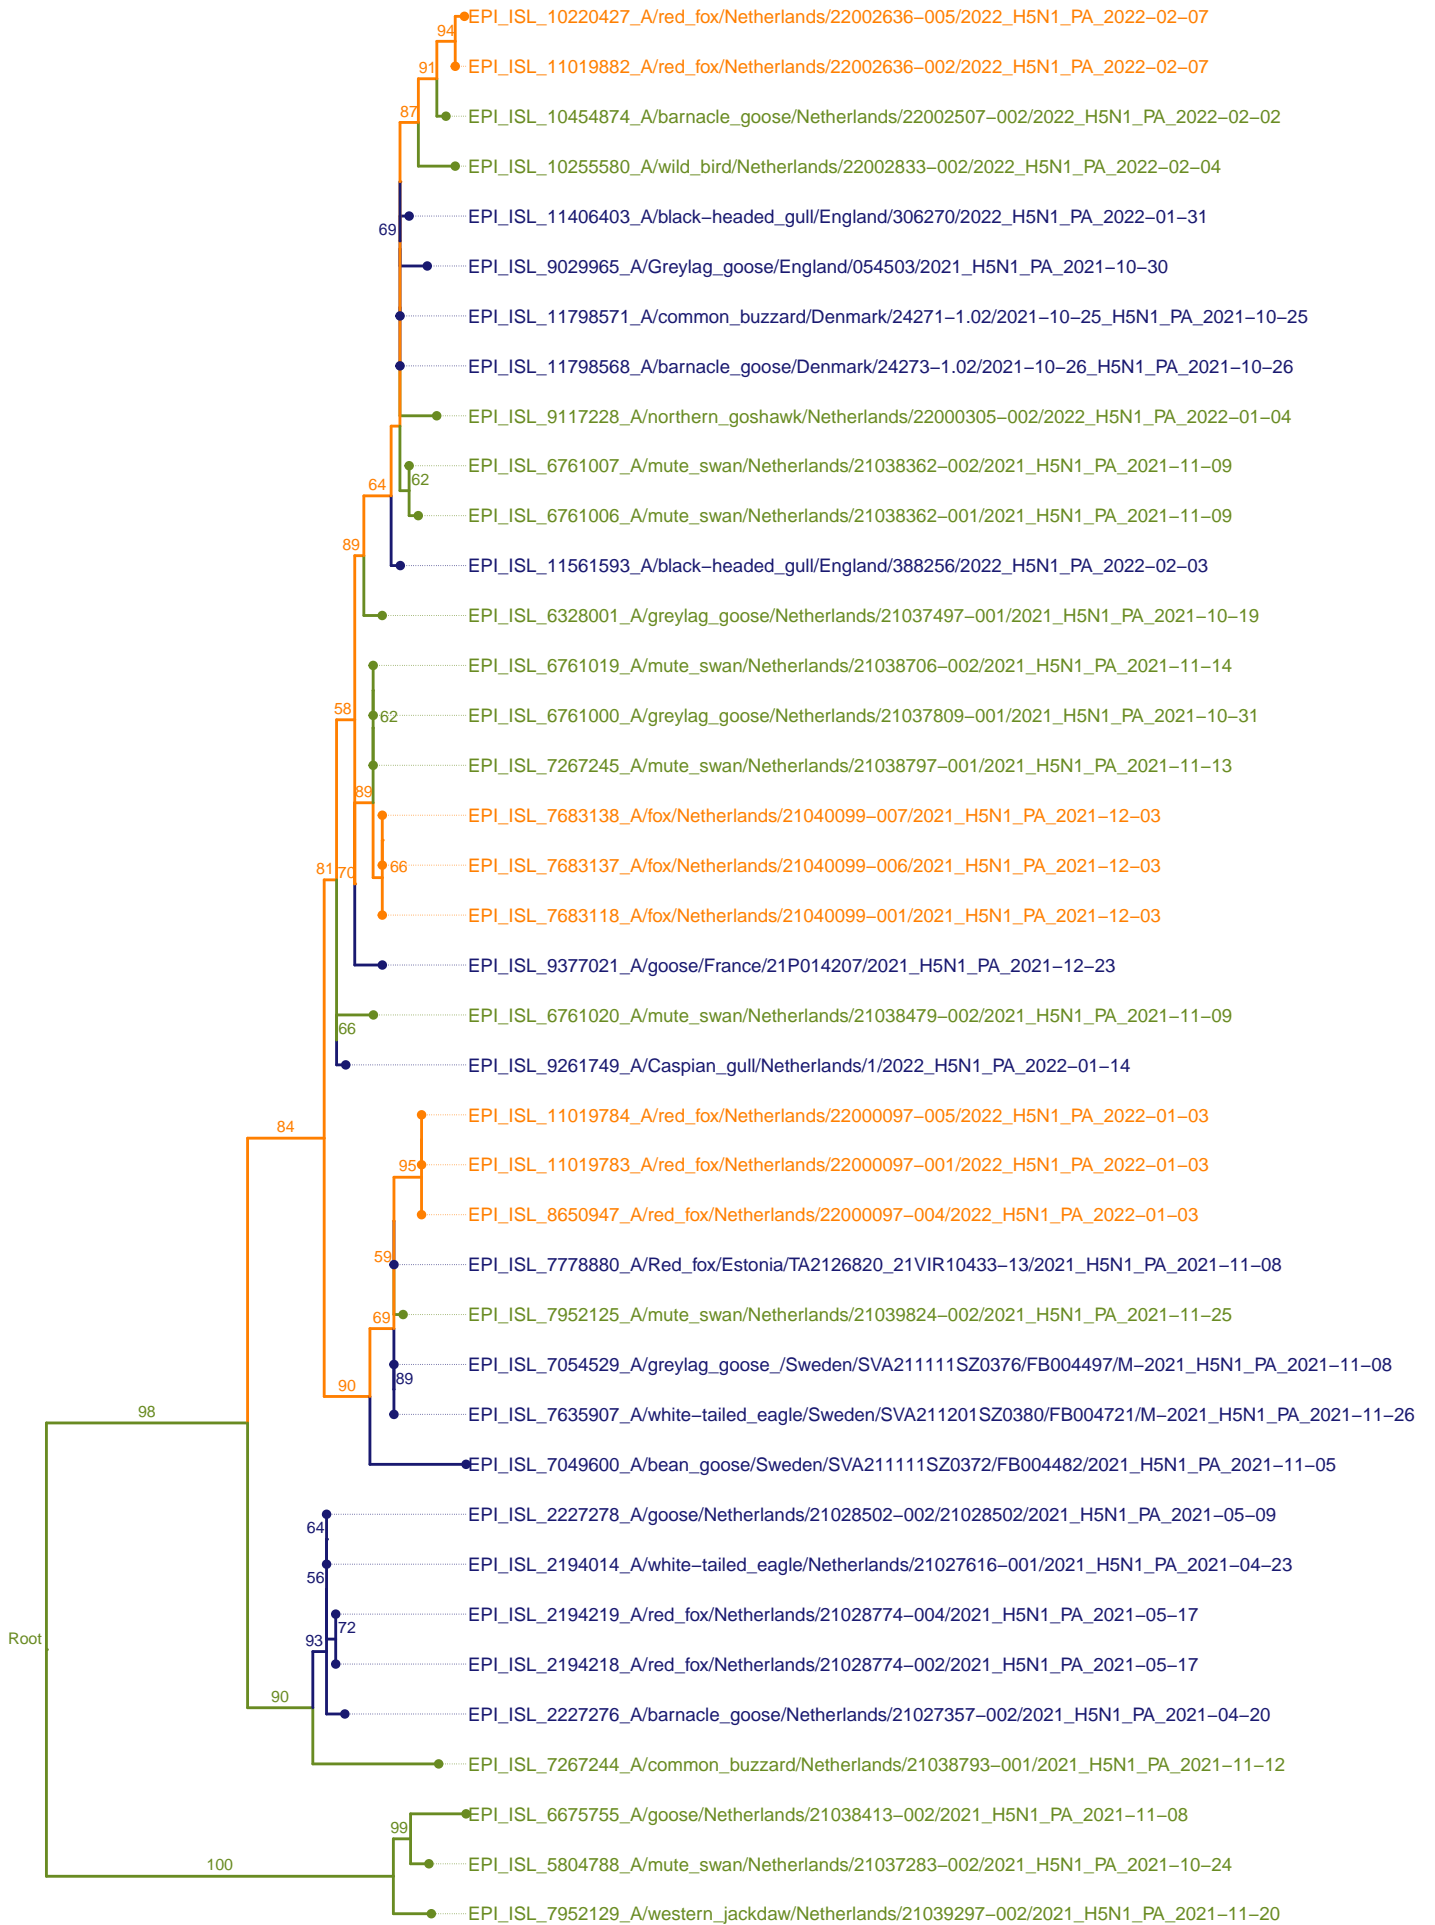

0.002

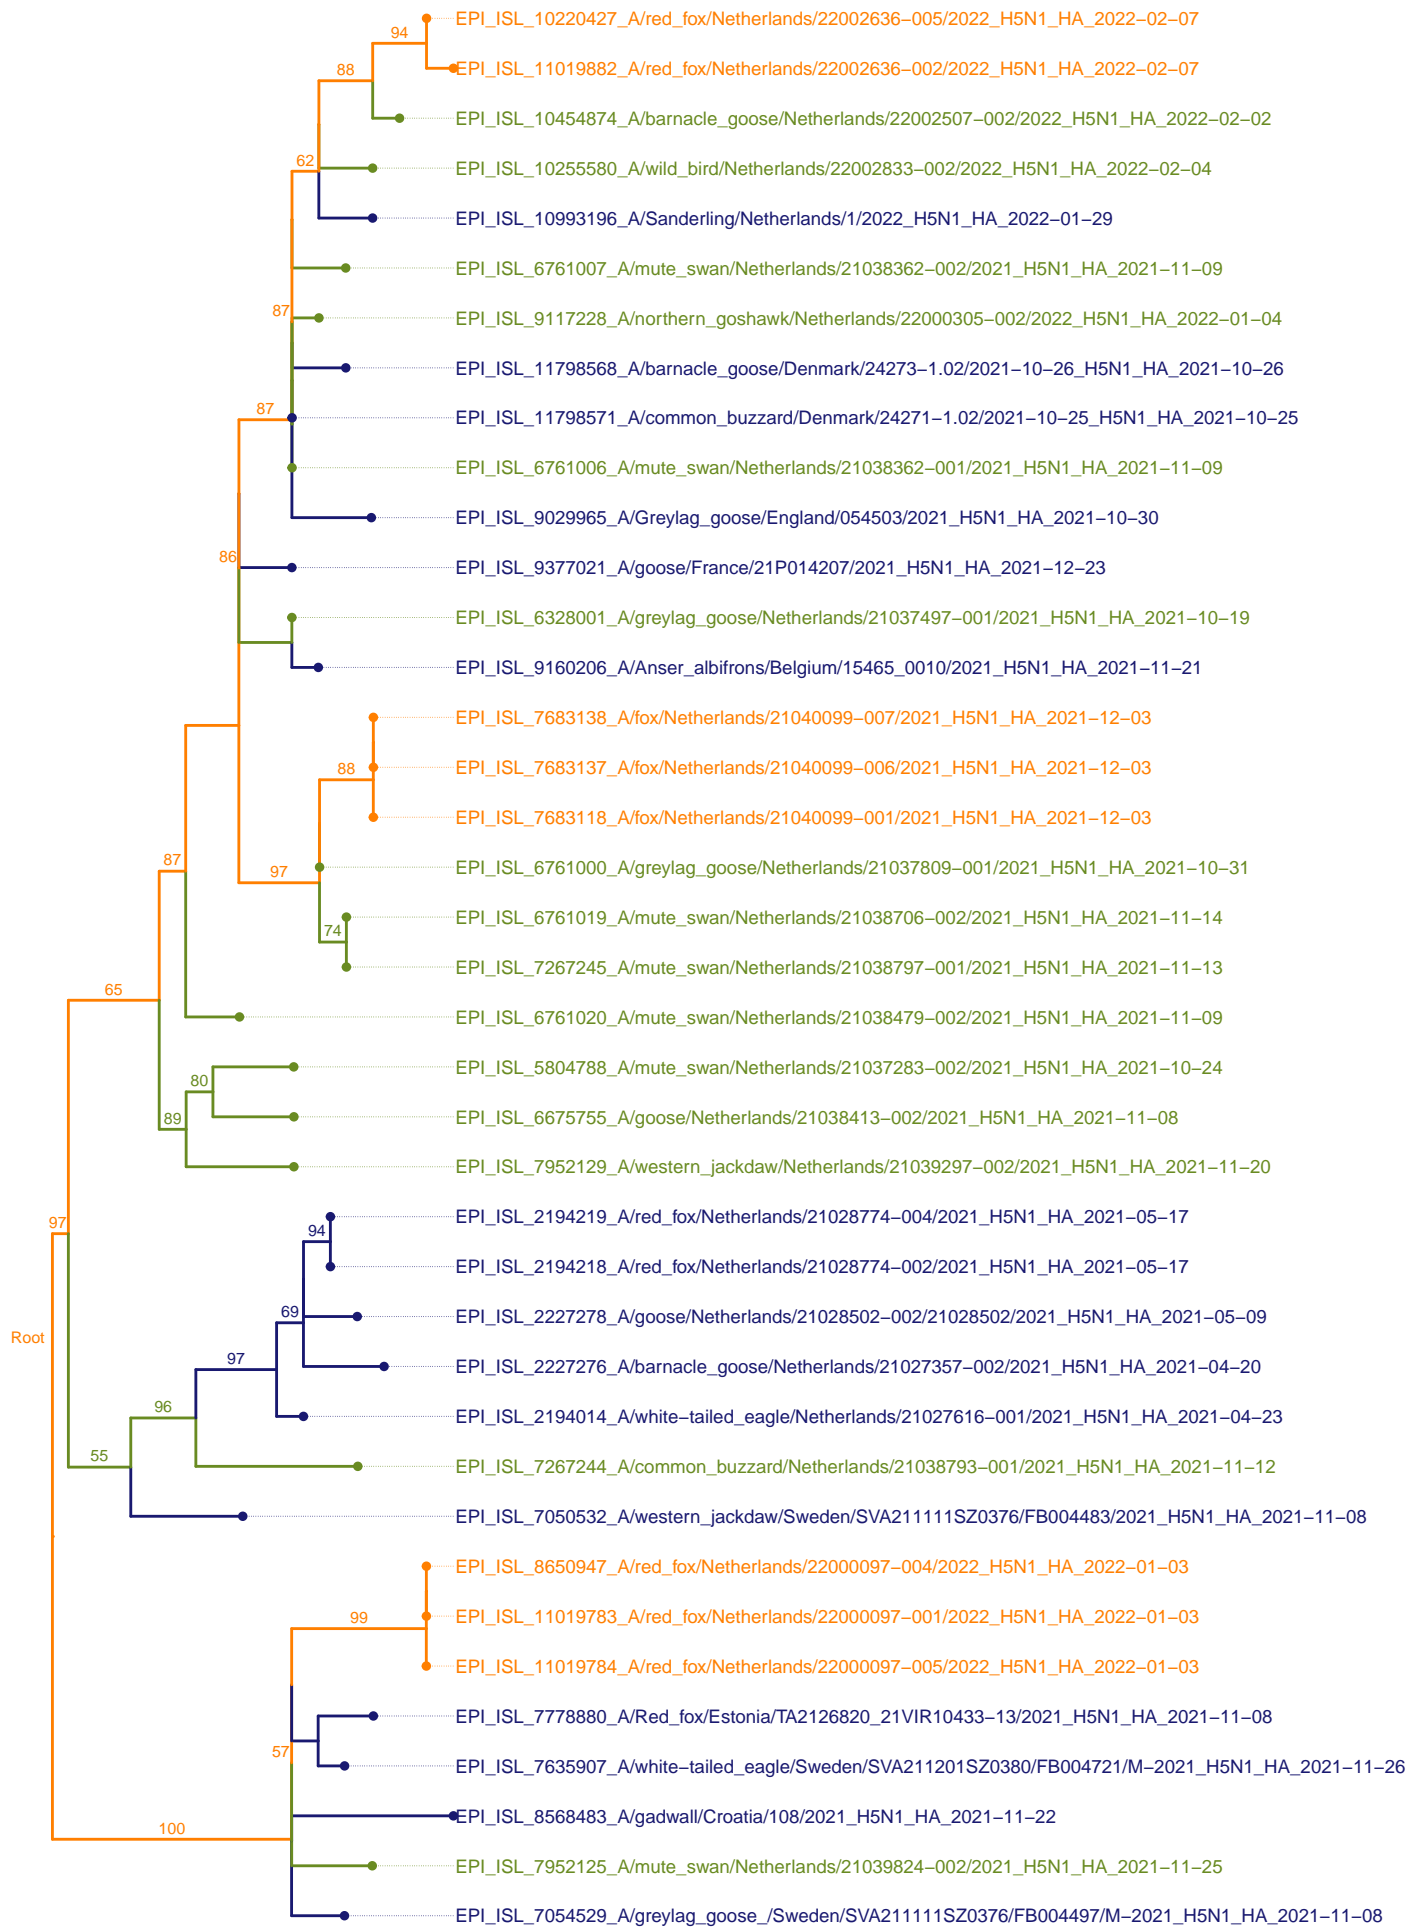

0.0008

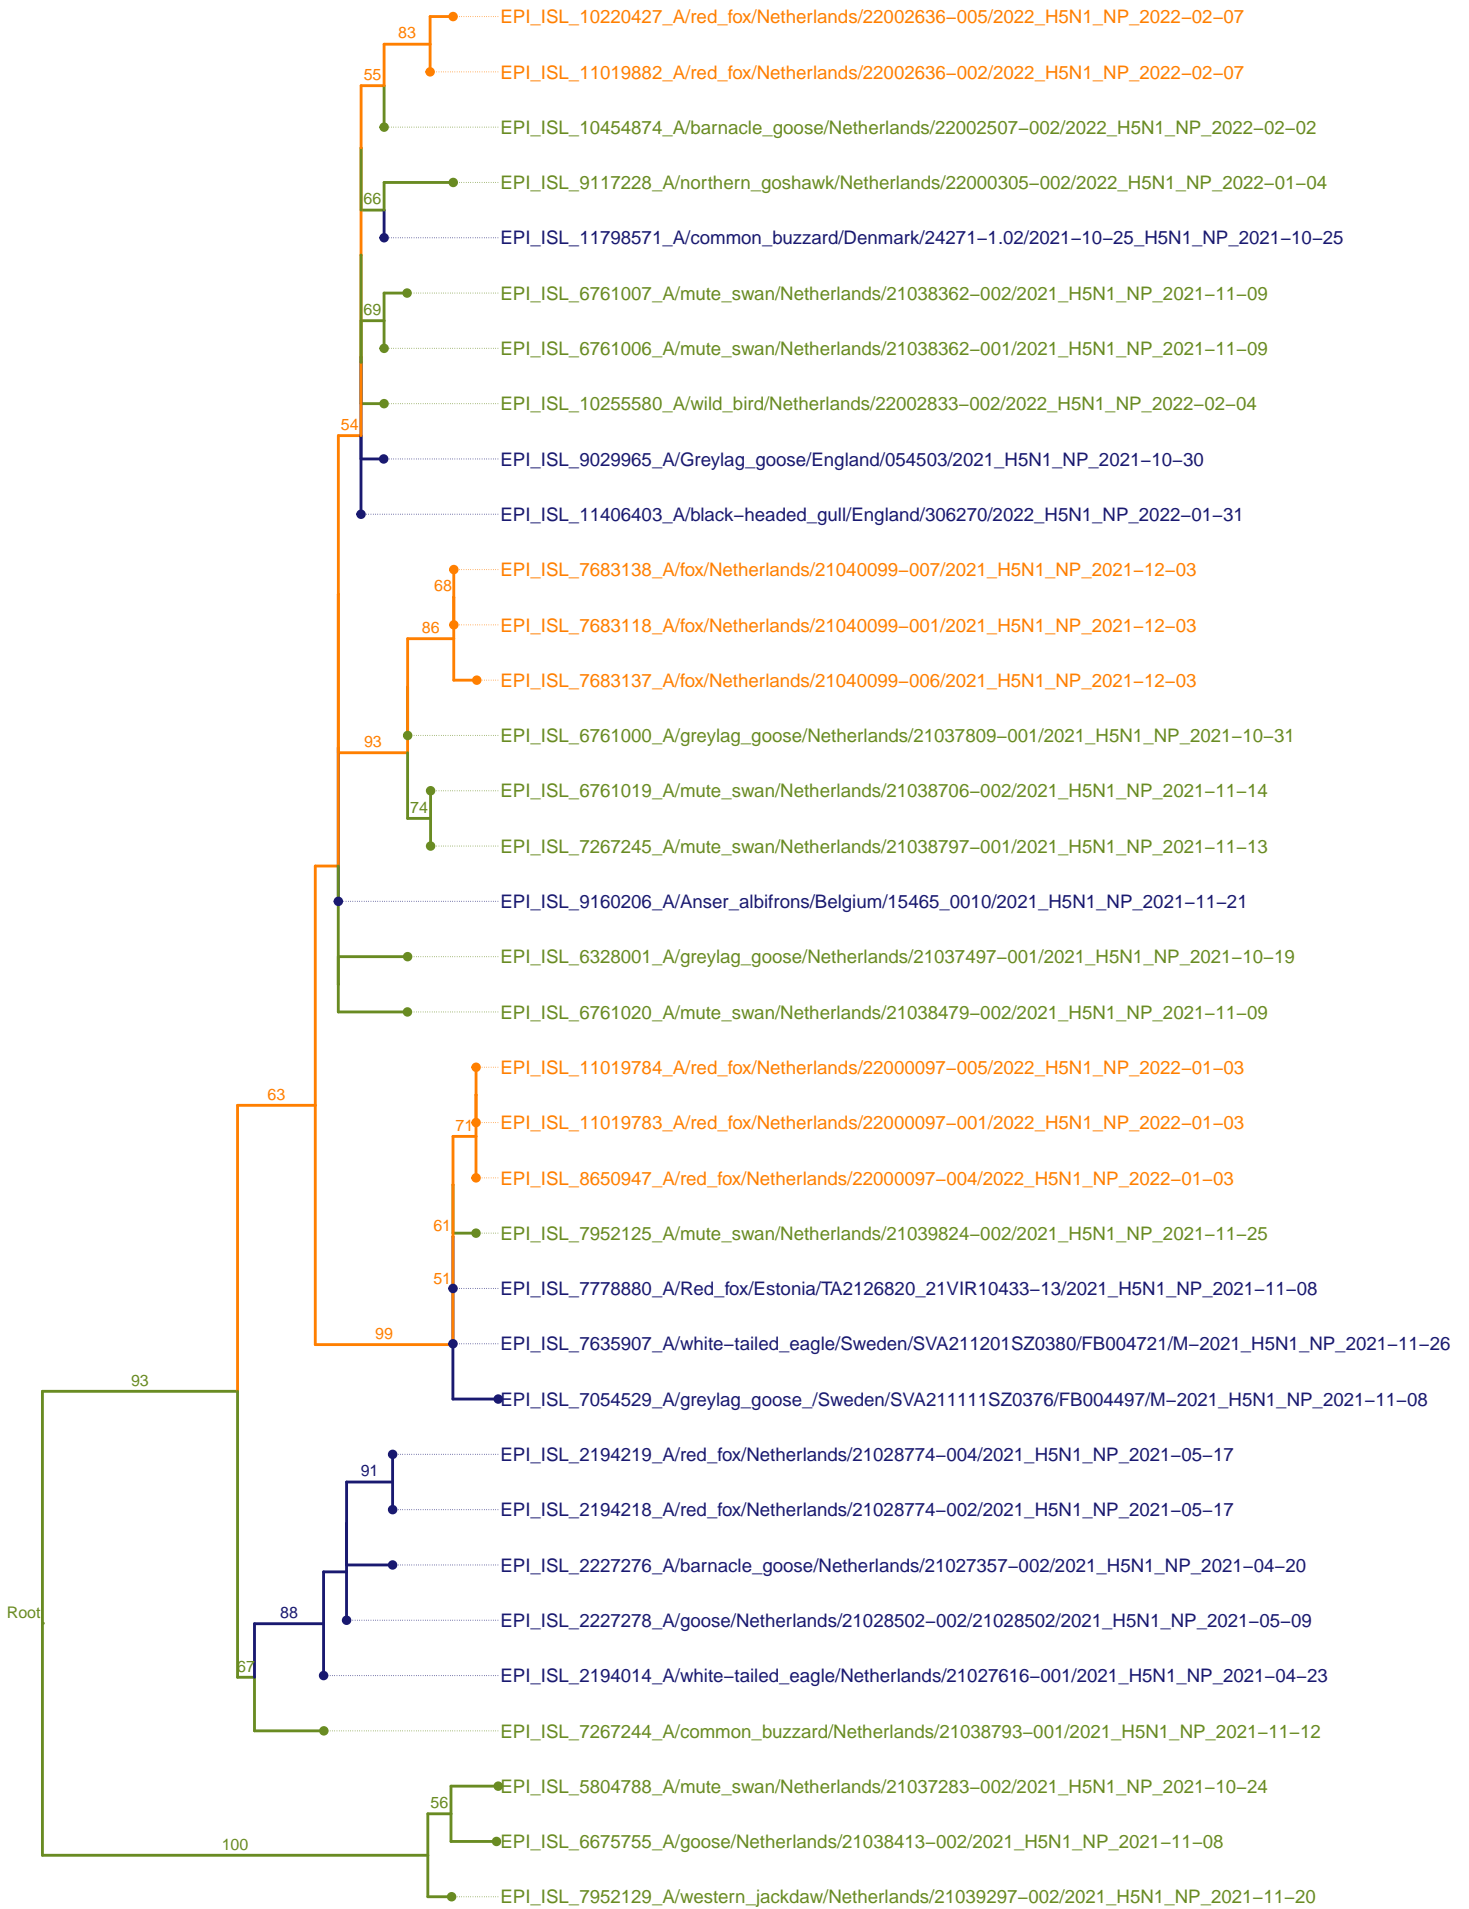

0.001

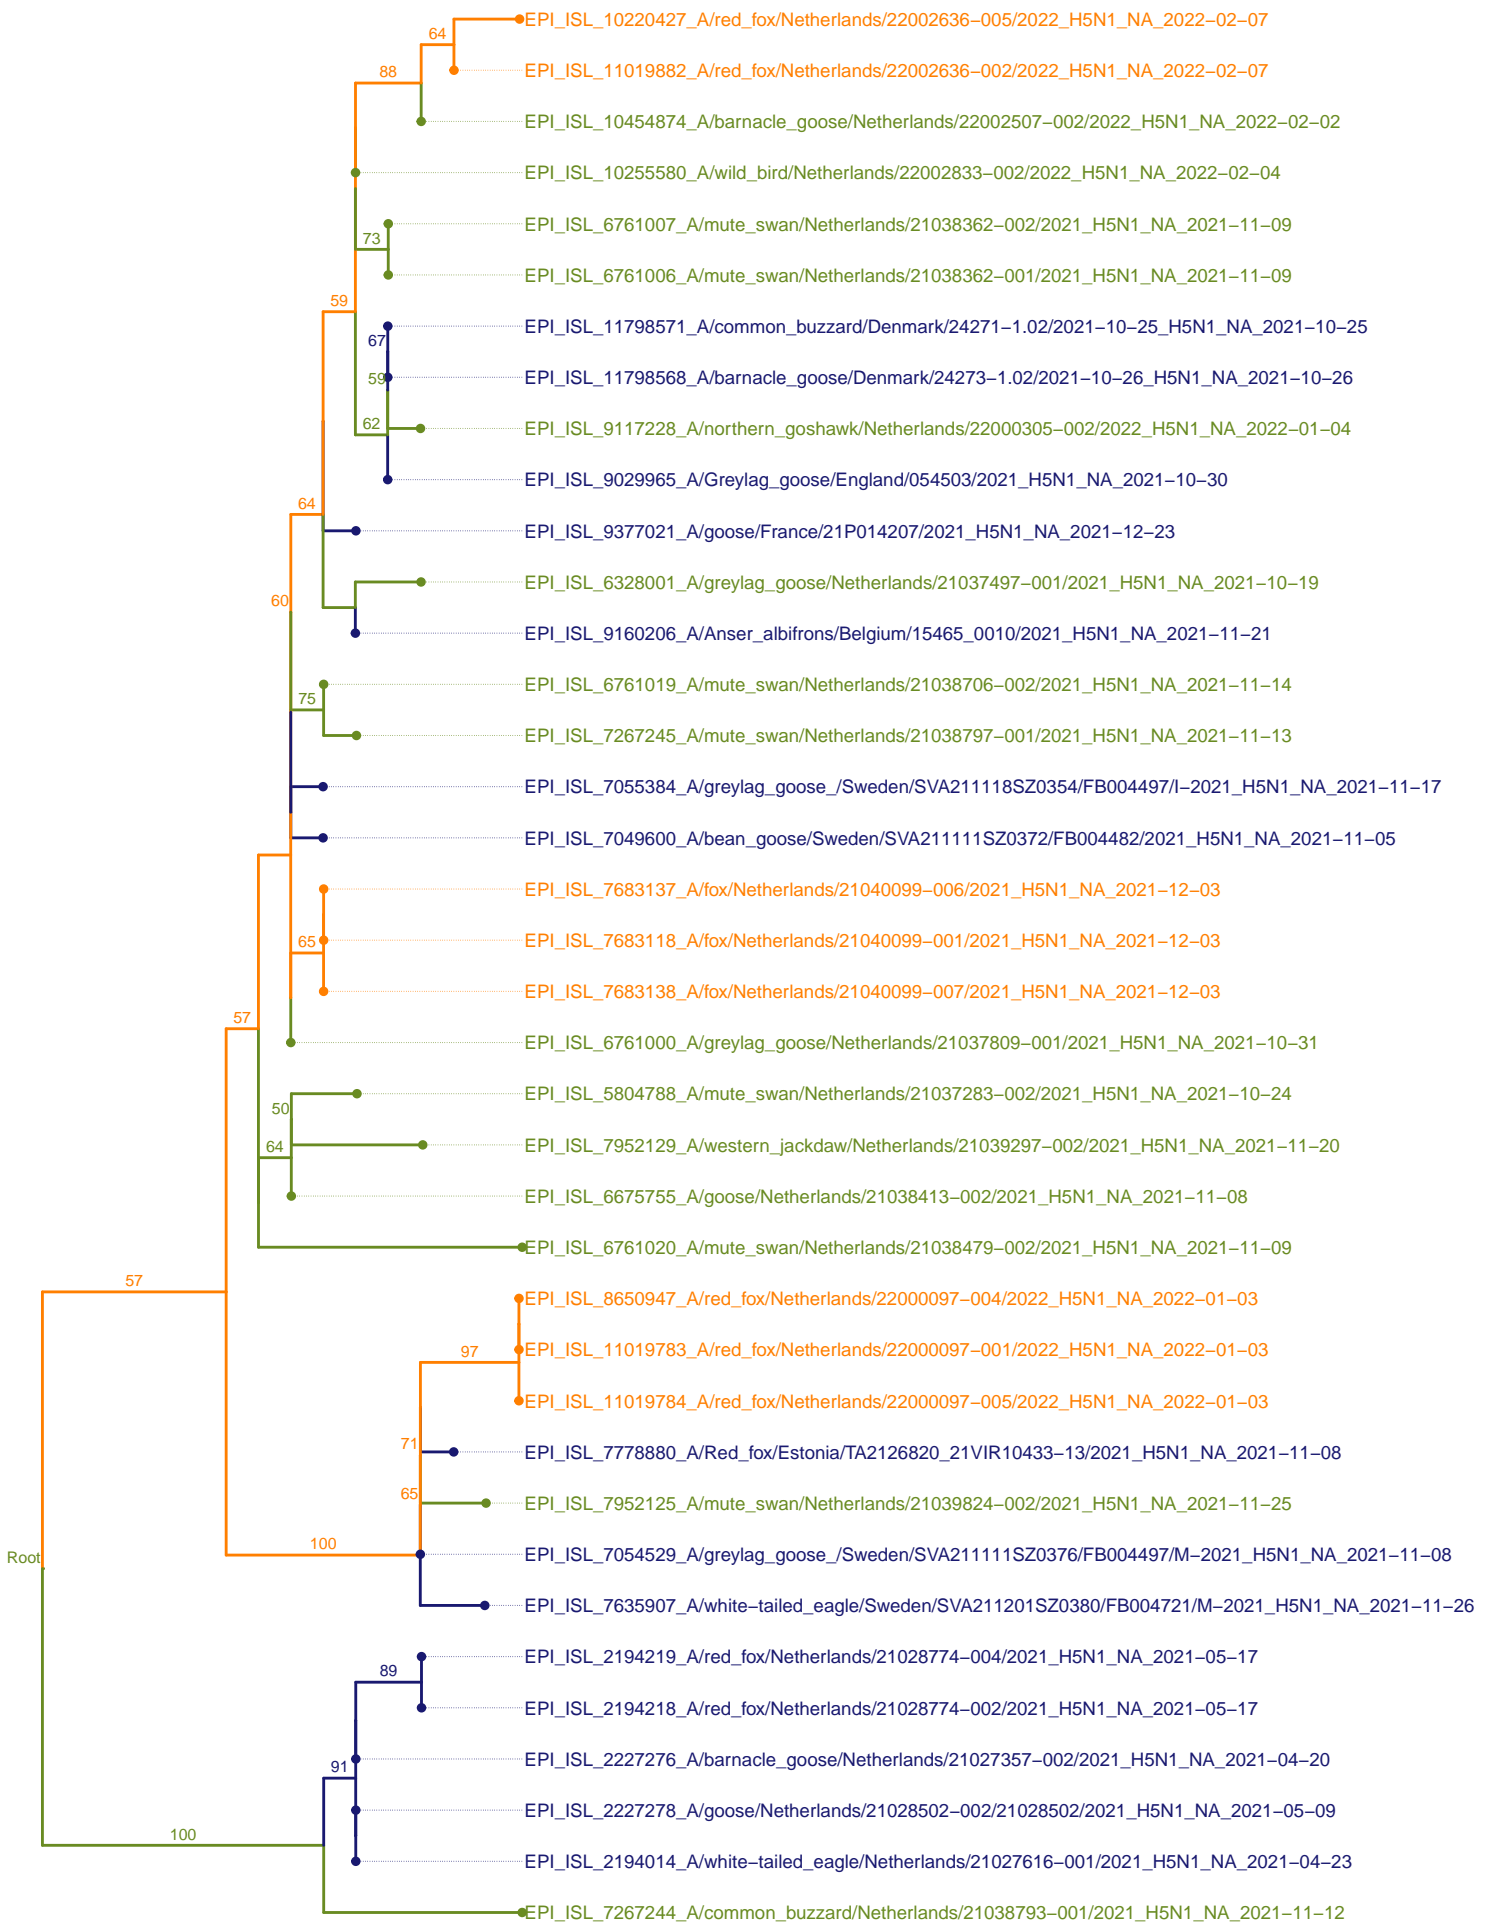

0.001



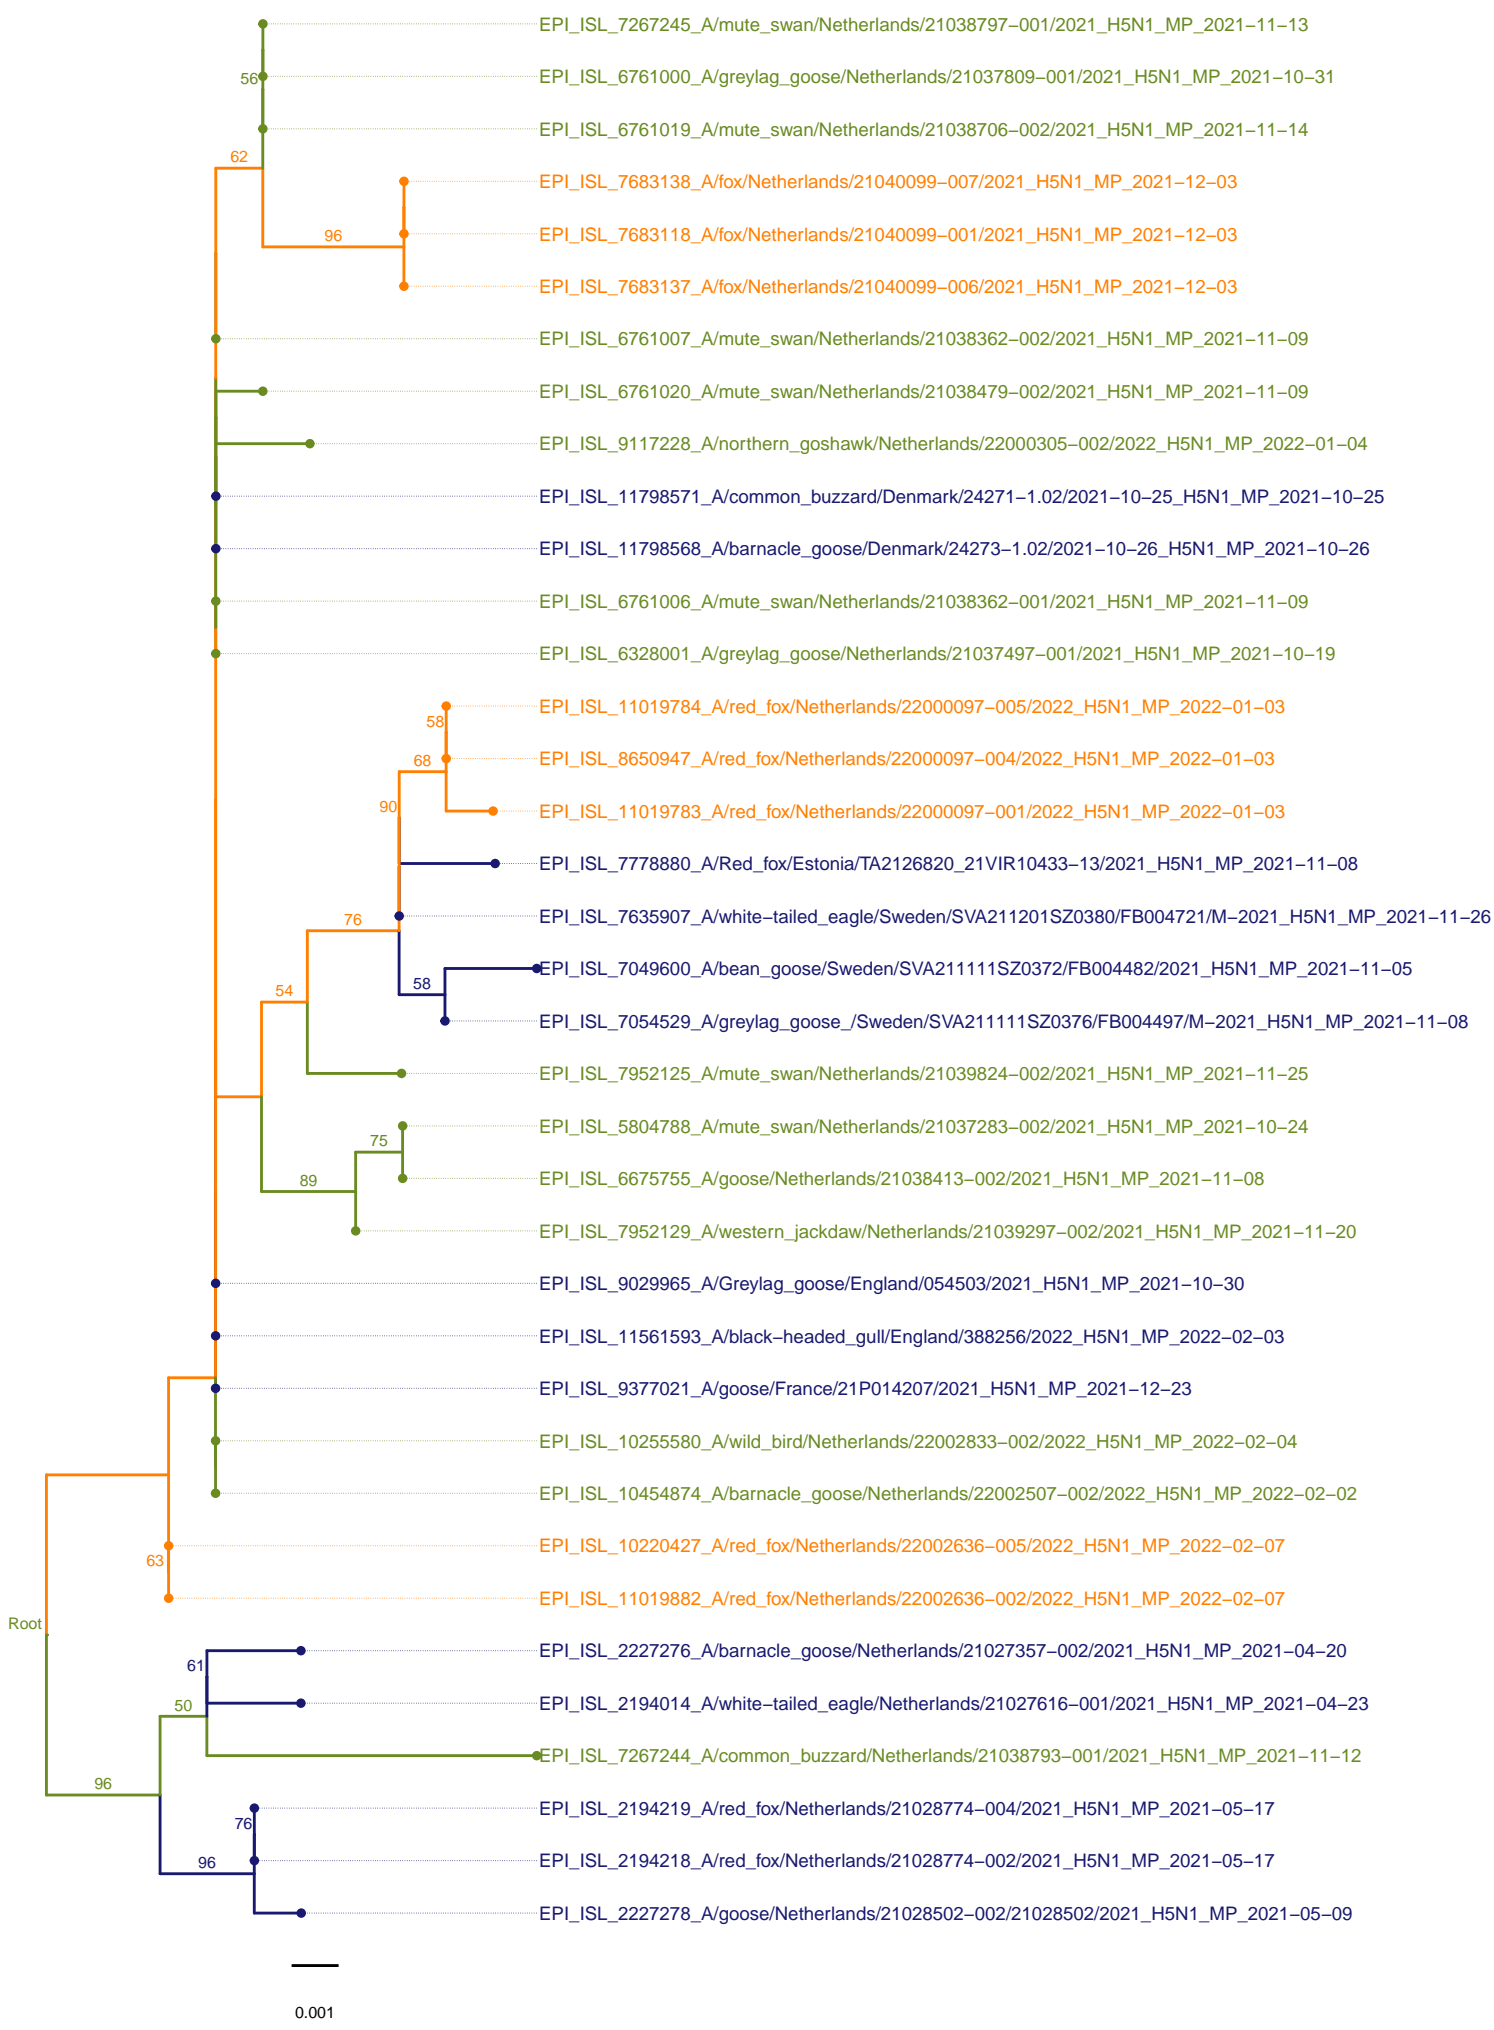

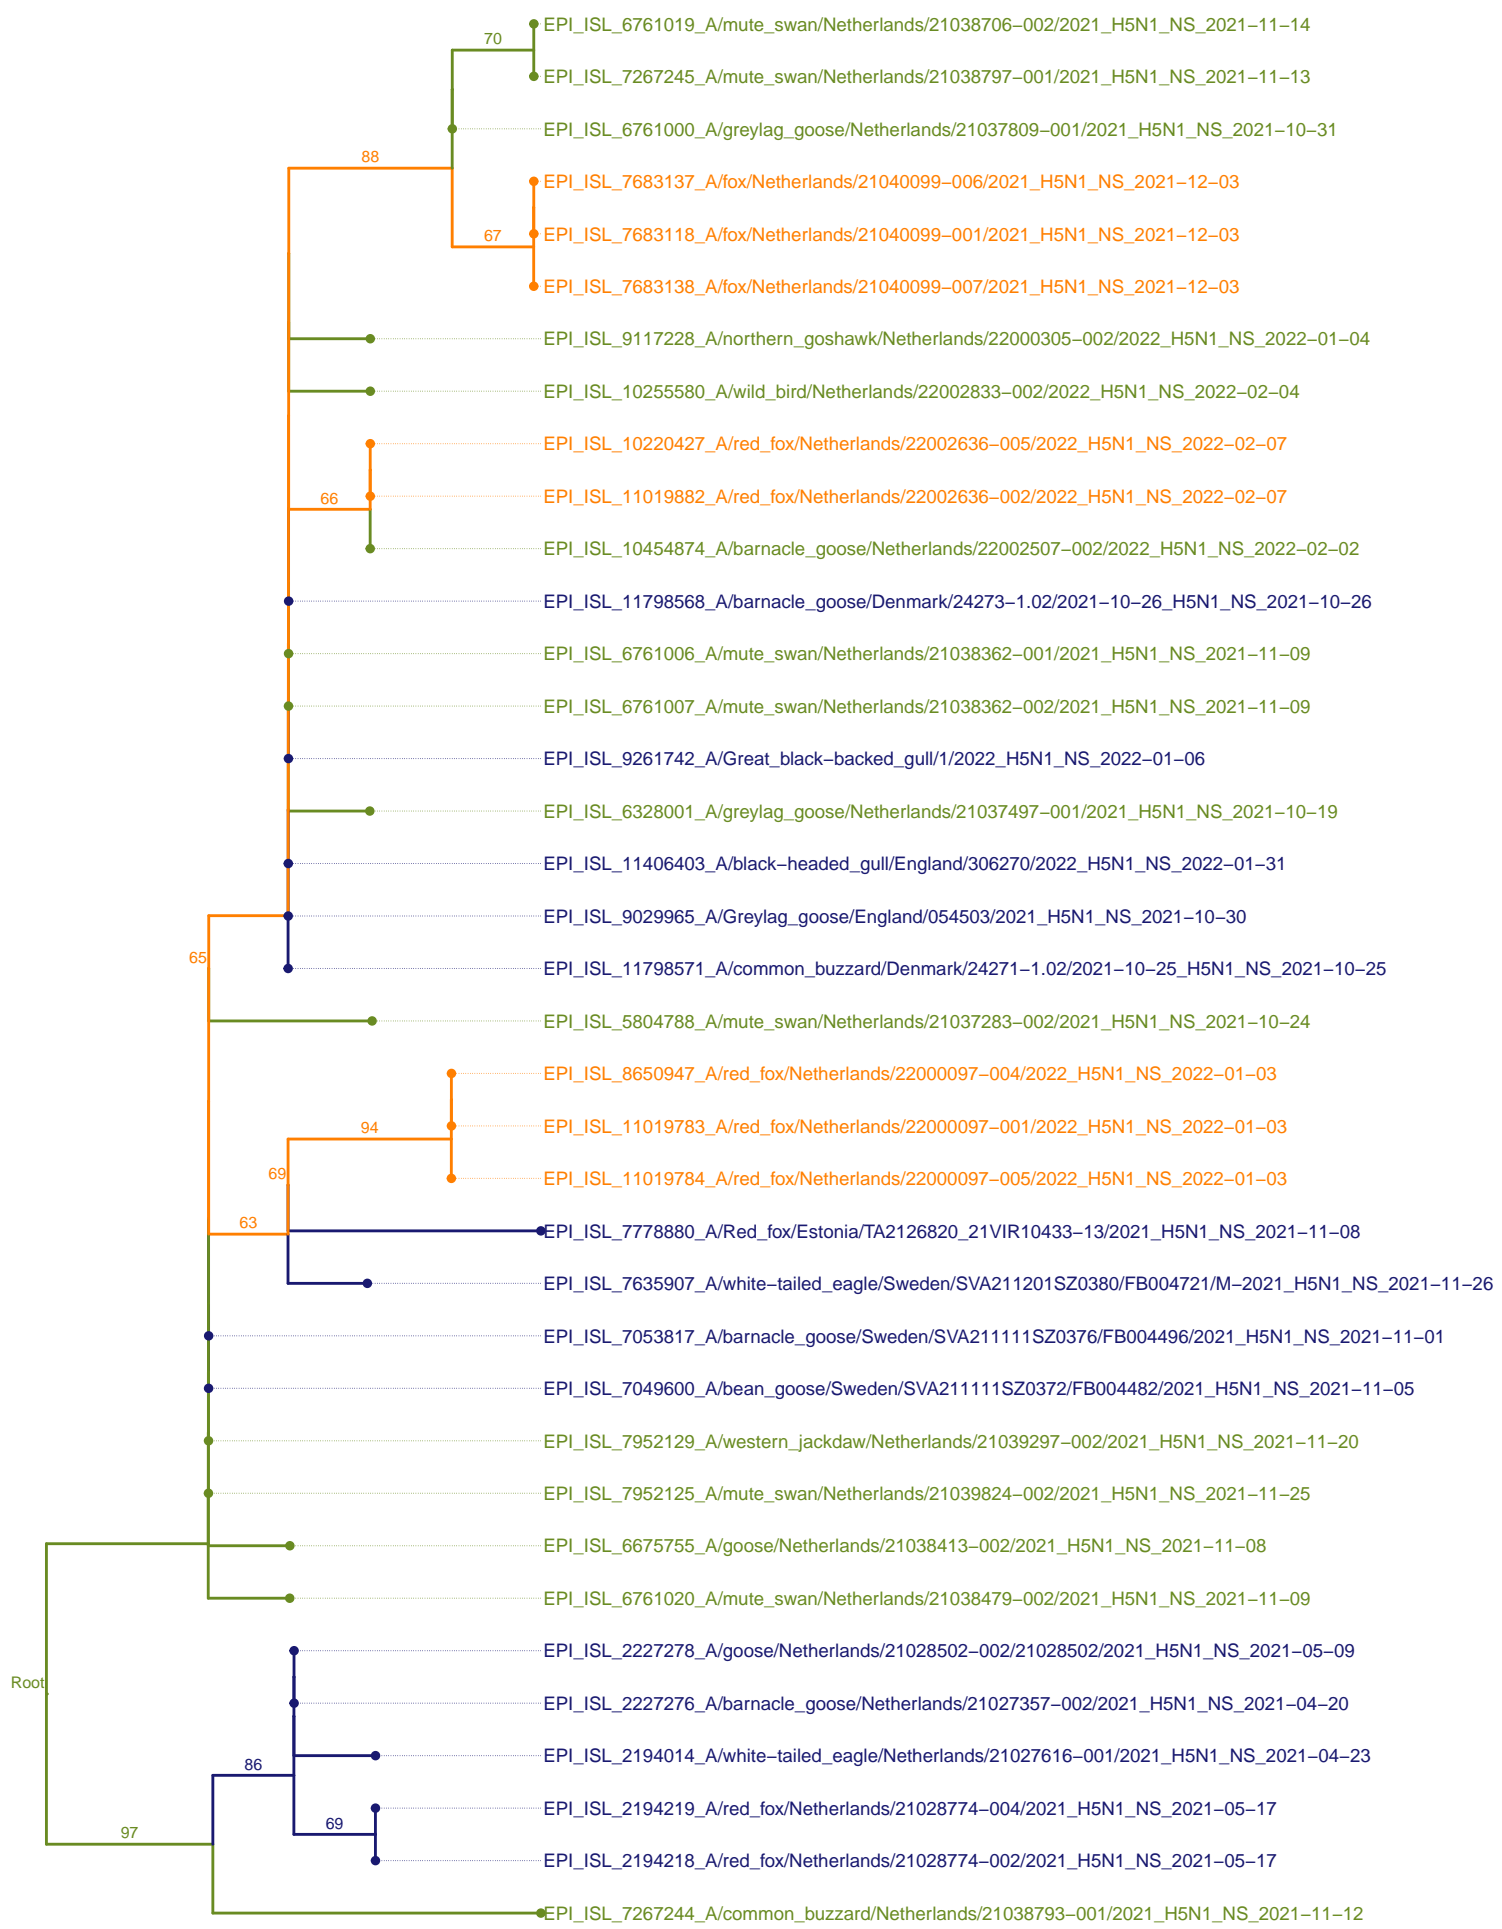

0.0007

Figure S1: Phylogenetic tree for all eight virus RNA segments obtained with the Maximum Likelihood method showing the viruses detected in the samples of the three foxes (orange), and closely related viral RNA sequences from other viruses detected in the Netherlands (green), Europe (blue) and relevant sequences form the 2020-2021 epizootic

**Table S2: Geographical and nucleotide distance between foxes and wild birds infected with HPAI.**

| Red fox           | Sample date | EPI-nr           | Sample type                       | X      | Y      | Closest wild bird virus | Wild bird species | Sample date | X      | Y      | Nt differences | Amino acid differences (wild bird to fox throat swab)                                                                                                                                                                              | Days since detection closest wild bird virus | Distance between locations (km) |
|-------------------|-------------|------------------|-----------------------------------|--------|--------|-------------------------|-------------------|-------------|--------|--------|----------------|------------------------------------------------------------------------------------------------------------------------------------------------------------------------------------------------------------------------------------|----------------------------------------------|---------------------------------|
| <b>Dorst</b>      | 2021-12-03  | EPI ISL 7683118  | Throat swab                       | 104419 | 389025 | EPI ISL 6761000         | greylag goose     | 2021-10-31  | 116555 | 425951 | 17             | <b>PB2-Q13H</b> ,<br>K332R,<br>A588V<br><b>PA-N115S</b><br><b>HA-E201K</b><br><b>NP-A234S</b><br><b>M2-T65K</b>                                                                                                                    | -33                                          | 38,9                            |
|                   |             | EPI ISL 7683137  | Amnion horn and medulla oblongata |        |        |                         |                   |             |        |        |                |                                                                                                                                                                                                                                    |                                              |                                 |
|                   |             | EPI ISL 7683138  | Cerebrum and cerebellum           |        |        |                         |                   |             |        |        |                |                                                                                                                                                                                                                                    |                                              |                                 |
| <b>Heemskerk</b>  | 2022-01-03  | EPI ISL 11019783 | Throat swab                       | 105024 | 502339 | EPI ISL 7952125         | mute swan         | 2021-11-25  | 208553 | 591693 | 42             | <b>PB1-F2</b><br>N17S,<br>K73R<br><b>PB1-I108L</b> ,<br>I113V,<br>L150F,<br>K531R<br><b>PA-L532I</b><br><b>HA-R339K</b><br><b>NA-E77K</b> ,<br>S148T<br><b>M1-G96A</b> ,<br>T182A<br><b>M2-I28F</b><br><b>NS1-P215S</b> ,<br>K221Q | -39                                          | 136,8                           |
|                   |             | EPI ISL 8650947  | Amnion horn and medulla oblongata |        |        |                         |                   |             |        |        |                |                                                                                                                                                                                                                                    |                                              |                                 |
|                   |             | EPI ISL 11019784 | Cerebrum and cerebellum           |        |        |                         |                   |             |        |        |                |                                                                                                                                                                                                                                    |                                              |                                 |
| <b>Oosterbeek</b> | 2022-02-07  | EPI ISL 11019882 | Throat swab                       | 186535 | 444255 | EPI_ISL 10454874        | barnacle goose    | 2022-02-02  | 208553 | 591693 | 22             | <b>PB2-A278T</b> ,<br>Q447R<br><b>PB1-N76D</b> ,<br>T182I,<br>G538D<br><b>PA-T20A</b> ,<br>F277S<br><b>HA-L7F</b> ,<br>K46Q,<br>S288G<br><b>NA-V94I</b>                                                                            | -5                                           | 149,1                           |
|                   |             | EPI ISL 10220427 | Cerebrum and cerebellum           |        |        |                         |                   |             |        |        |                |                                                                                                                                                                                                                                    |                                              |                                 |

**Table S3: MLL analysis of variables time and virus variants 627E-627K.**

| <b>Time [h]</b> | <b>Temperature [°C]</b> | <b>Estimate</b> | <b>SE</b> | <b>df</b> | <b>t.ratio</b> | <b>p.value</b> |
|-----------------|-------------------------|-----------------|-----------|-----------|----------------|----------------|
| <b>12</b>       | 33                      | -0.0903         | 0.231     | 5.01      | -0.391         | 0.7120         |
| <b>24</b>       | 33                      | -0.3993         | 0.231     | 5.01      | -1.729         | 0.1443         |
| <b>48</b>       | 33                      | -0.9167         | 0.231     | 5.01      | -3.969         | 0.0106         |
| <b>72</b>       | 33                      | -0.9792         | 0.231     | 5.01      | -4.239         | 0.0081         |
| <b>12</b>       | 37                      | -0.0903         | 0.231     | 5.01      | -0.391         | 0.7120         |
| <b>24</b>       | 37                      | -0.3993         | 0.231     | 5.01      | -1.729         | 0.1443         |
| <b>48</b>       | 37                      | -0.9167         | 0.231     | 5.01      | -3.969         | 0.0106         |
| <b>72</b>       | 37                      | -0.9792         | 0.231     | 5.01      | -4.239         | 0.0081         |

**Table S4: MLL analysis of variables time and temperatures 33°C and 37°C.**

| <b>Time [h]</b> | <b>PB2 variant</b> | <b>Estimate</b> | <b>SE</b> | <b>df</b> | <b>t.ratio</b> | <b>p.value</b> |
|-----------------|--------------------|-----------------|-----------|-----------|----------------|----------------|
| <b>12</b>       | 627E               | 0.00694         | 0.168     | 272       | 0.041          | 0.9671         |
| <b>12</b>       | 627K               | 0.00694         | 0.168     | 272       | 0.041          | 0.9671         |
| <b>24</b>       | 627E               | -1.28125        | 0.168     | 272       | -7.619         | <0.0001        |
| <b>24</b>       | 627K               | -1.28125        | 0.168     | 272       | -7.619         | <0.0001        |
| <b>48</b>       | 627E               | -0.40792        | 0.168     | 272       | -2.436         | 0.0155         |
| <b>48</b>       | 627K               | -0.40792        | 0.168     | 272       | -2.436         | 0.0155         |
| <b>72</b>       | 627E               | 0.39583         | 0.168     | 272       | 2.354          | 0.0193         |
| <b>72</b>       | 627K               | 0.39583         | 0.168     | 272       | 2.354          | 0.0193         |

**Table S5: GISAID accession numbers**

We gratefully acknowledge the authors, originating and submitting laboratories of the sequences from GISAID's EpiFlu™ Database on which this research is based. The list is detailed below. All submitters of data may be contacted directly via [www.gisaid.org](http://www.gisaid.org)

| Isolate-ID       | Country        | Collection date | Isolate name                                           | Originating Lab                               | Submitting Lab                                                 | Authors                                                                                                                                                             |
|------------------|----------------|-----------------|--------------------------------------------------------|-----------------------------------------------|----------------------------------------------------------------|---------------------------------------------------------------------------------------------------------------------------------------------------------------------|
| EPI_ISL_9377021  | France         | 2021-Dec-23     | A/goose/France/21P014207/2021                          | Anses (Ploufragan-Plouzané)                   | ANSES Agence Nationale De Securite Sanitaire De L'alimentation |                                                                                                                                                                     |
| EPI_ISL_6675755  | Netherlands    | 2021-Nov-08     | A/goose/Netherlands/21038413-002/2021                  | Wageningen Bioveterinary Research             | Wageningen Bioveterinary Research                              | Beerens, Nancy; Harders, Frank; Pritz-Verschuren, Sylvia; Roose, Marit; Germeraad, Evelien; Engelsma, Marc; Heutink, Rene                                           |
| EPI_ISL_2227278  | Netherlands    | 2021-May-09     | A/goose/Netherlands/21028502-002/21028502/2021         | Wageningen Bioveterinary Research             | Wageningen Bioveterinary Research                              | Beerens, Nancy; Harders, Frank; Pritz-Verschuren, Sylvia; Roose, Marit; Germeraad, Evelien; Engelsma, Marc; Bossers, Alex; Heutink, Rene                            |
| EPI_ISL_9029965  | United Kingdom | 2021-Oct-30     | A/Greylag_goose/England/054503/2021                    | Animal and Plant Health Agency (APHA)         | Animal and Plant Health Agency (APHA)                          |                                                                                                                                                                     |
| EPI_ISL_6761000  | Netherlands    | 2021-Oct-31     | A/greylag_goose/Netherlands/21037809-001/2021          | Wageningen Bioveterinary Research             | Wageningen Bioveterinary Research                              | Beerens, Nancy; Harders, Frank; Pritz-Verschuren, Sylvia; Roose, Marit; Germeraad, Evelien; Engelsma, Marc; Heutink, Rene                                           |
| EPI_ISL_6328001  | Netherlands    | 2021-Oct-19     | A/greylag_goose/Netherlands/21037497-001/2021          | Wageningen Bioveterinary Research             | Wageningen Bioveterinary Research                              | Beerens, Nancy; Harders, Frank; Pritz-Verschuren, Sylvia; Roose, Marit; Germeraad, Evelien; Engelsma, Marc; Heutink, Rene                                           |
| EPI_ISL_7952125  | Netherlands    | 2021-Nov-25     | A/mute swan/Netherlands/21039824-002/2021              | Wageningen Bioveterinary Research             | Wageningen Bioveterinary Research                              | Beerens, Nancy; Harders, Frank; Pritz-Verschuren, Sylvia; Roose, Marit; Venema, Sandra; Germeraad, Evelien; Engelsma, Marc; Heutink, Rene                           |
| EPI_ISL_6761020  | Netherlands    | 2021-Nov-09     | A/mute swan/Netherlands/21038479-002/2021              | Wageningen Bioveterinary Research             | Wageningen Bioveterinary Research                              | Beerens, Nancy; Harders, Frank; Pritz-Verschuren, Sylvia; Roose, Marit; Germeraad, Evelien; Engelsma, Marc; Heutink, Rene                                           |
| EPI_ISL_5804788  | Netherlands    | 2021-Oct-24     | A/Mute swan/Netherlands/21037283-002/2021              | Wageningen Bioveterinary Research             | Wageningen Bioveterinary Research                              | Beerens, Nancy; Harders, Frank; Pritz-Verschuren, Sylvia; Roose, Marit; Germeraad, Evelien; Engelsma, Marc; Heutink, Rene                                           |
| EPI_ISL_7952129  | Netherlands    | 2021-Nov-20     | A/western jackdaw/Netherlands/21039297-002/2021        | Wageningen Bioveterinary Research             | Wageningen Bioveterinary Research                              | Beerens, Nancy; Harders, Frank; Pritz-Verschuren, Sylvia; Roose, Marit; Venema, Sandra; Germeraad, Evelien; Engelsma, Marc; Heutink, Rene                           |
| EPI_ISL_2194219  | Netherlands    | 2021-May-17     | A/red fox/Netherlands/21028774-004/2021                | Wageningen Bioveterinary Research             | Wageningen Bioveterinary Research                              | Beerens, Nancy; Harders, Frank; Pritz-Verschuren, Sylvia; Roose, Marit; Germeraad, Evelien; Engelsma, Marc; Bossers, Alex; Heutink, Rene                            |
| EPI_ISL_7778880  | Estonia        | 2021-Nov-08     | A/Red_fox/Estonia/TA2126820_21VIR10433-13/2021         | Estonian Veterinary and Food Laboratory       | Istituto Zooprofilattico Sperimentale Delle Venezie            | Nurmoja, I.; Vilem, A.; Juurik, T.; Zecchin, B.; Fusaro, A.; Schivo, A.; Salviato, A.; Palumbo, E.; Milani, A.; Giussani, E.; Pastori, A.; Monne, I.; Terregino, C. |
| EPI_ISL_2194218  | Netherlands    | 2021-May-17     | A/red fox/Netherlands/21028774-002/2021                | Wageningen Bioveterinary Research             | Wageningen Bioveterinary Research                              | Beerens, Nancy; Harders, Frank; Pritz-Verschuren, Sylvia; Roose, Marit; Germeraad, Evelien; Engelsma, Marc; Bossers, Alex; Heutink, Rene                            |
| EPI_ISL_9261751  | Netherlands    | 2022-Jan-14     | A/Barnacle_goose/Netherlands/6/2022                    | Erasmus Medical Center                        | Erasmus Medical Center                                         |                                                                                                                                                                     |
| EPI_ISL_9261749  | Netherlands    | 2022-Jan-14     | A/Caspian_gull/Netherlands/1/2022                      | Erasmus Medical Center                        | Erasmus Medical Center                                         |                                                                                                                                                                     |
| EPI_ISL_9261742  | Netherlands    | 2022-Jan-06     | A/Great_black-backed_gull/1/2022                       | Erasmus Medical Center                        | Erasmus Medical Center                                         |                                                                                                                                                                     |
| EPI_ISL_10993196 | Netherlands    | 2022-Jan-29     | A/Sanderling/Netherlands/1/2022                        | Erasmus Medical Center                        | Erasmus Medical Center                                         |                                                                                                                                                                     |
| EPI_ISL_7050532  | Sweden         | 2021-Nov-08     | A/western jackdaw/Sweden/SVA211111SZ0376/FB004483/2021 | National Veterinary Institute, SVA            | National Veterinary Institute                                  |                                                                                                                                                                     |
| EPI_ISL_502614   | Belgium        | 2018-Apr-09     | A/Anas platyrhynchos/Belgium/7976/2018                 |                                               | Import from public-domain                                      | Lambrecht,B.; Steensels,M.; Fusaro,A.; Milani,A.; Pastori,A.; Schivo,A.; Salviato,A.; Zamperin,G.; Monne,I.; Terregino,C.                                           |
| EPI_ISL_502613   | Belgium        | 2018-Aug-29     | A/Anas platyrhynchos/Belgium/7828/2018                 |                                               | Import from public-domain                                      | Lambrecht,B.; Steensels,M.; Fusaro,A.; Milani,A.; Pastori,A.; Schivo,A.; Salviato,A.; Zamperin,G.; Monne,I.; Terregino,C.                                           |
| EPI_ISL_8568483  | Croatia        | 2021-Nov-22     | A/gadwall/Croatia/108/2021                             | Croatian Veterinary Institute, Poultry Centre | Croatian Veterinary Institute                                  | Savić, Vladimir                                                                                                                                                     |
| EPI_ISL_9117228  | Netherlands    | 2022-Jan-04     | A/northern_goshawk/Netherlands/22000305-002/2022       | Wageningen Bioveterinary Research             | Wageningen Bioveterinary Research                              | Beerens, Nancy; Harders, Frank; Pritz-Verschuren, Sylvia; Roose, Marit; Venema, Sandra; Germeraad, Evelien; Engelsma, Marc; Heutink, Rene                           |
| EPI_ISL_11798571 | Denmark        | 2021-Oct-25     | A/common_buzzard/Denmark/24271-1.02/2021-10-25         | Statens Serum Institute                       | Statens Serum Institute                                        | Charlotte Hjulsager, Yuan Liang                                                                                                                                     |

|                  |                    |             |                                                             |                                                          |                                                     |                                                                                                                                           |
|------------------|--------------------|-------------|-------------------------------------------------------------|----------------------------------------------------------|-----------------------------------------------------|-------------------------------------------------------------------------------------------------------------------------------------------|
| EPI_ISL_7267244  | Netherlands        | 2021-Nov-12 | A/common buzzard/Netherlands/21038793-001/2021              | Wageningen Bioveterinary Research                        | Wageningen Bioveterinary Research                   | Beerens, Nancy; Harders, Frank; Pritz-Verschuren, Sylvia; Roose, Marit; Venema, Sandra; Germeraad, Evelien; Engelsma, Marc; Heutink, Rene |
| EPI_ISL_2194014  | Netherlands        | 2021-Apr-23 | A/white-tailed eagle/Netherlands/21027616-001/2021          | Wageningen Bioveterinary Research                        | Wageningen Bioveterinary Research                   | Beerens, Nancy; Harders, Frank; Pritz-Verschuren, Sylvia; Roose, Marit; Germeraad, Evelien; Engelsma, Marc; Bossers, Alex; Heutink, Rene  |
| EPI_ISL_7055384  | Sweden             | 2021-Nov-17 | A/greylag goose/Sweden/SVA211118SZ0354/FB004497/I-2021      | National Veterinary Institute, SVA                       | National Veterinary Institute                       |                                                                                                                                           |
| EPI_ISL_7054529  | Sweden             | 2021-Nov-08 | A/greylag goose/Sweden/SVA211111SZ0376/FB004497/M-2021      | National Veterinary Institute, SVA                       | National Veterinary Institute                       |                                                                                                                                           |
| EPI_ISL_7049600  | Sweden             | 2021-Nov-05 | A/bean goose/Sweden/SVA211111SZ0372/FB004482/2021           | National Veterinary Institute, SVA                       | National Veterinary Institute                       |                                                                                                                                           |
| EPI_ISL_7635907  | Sweden             | 2021-Nov-26 | A/white-tailed eagle/Sweden/SVA211201SZ0380/FB004721/M-2021 | National Veterinary Institute, SVA                       | National Veterinary Institute                       |                                                                                                                                           |
| EPI_ISL_11561593 | United Kingdom     | 2022-Feb-03 | A/black-headed gull/England/388256/2022                     | Animal and Plant Health Agency (APHA)                    | Animal and Plant Health Agency (APHA)               |                                                                                                                                           |
| EPI_ISL_11406403 | United Kingdom     | 2022-Jan-31 | A/black-headed gull/England/306270/2022                     | Animal and Plant Health Agency (APHA)                    | Animal and Plant Health Agency (APHA)               |                                                                                                                                           |
| EPI_ISL_11798568 | Denmark            | 2021-Oct-26 | A/barnacle_goose/Denmark/24273-1.02/2021-10-26              | Statens Serum Institute                                  | Statens Serum Institute                             | Charlotte Hjulsager, Yuan Liang                                                                                                           |
| EPI_ISL_267243   | Netherlands        | 2014-Dec-15 | A/barnacle goose/Netherlands/2/2014                         |                                                          | Import from public-domain                           |                                                                                                                                           |
| EPI_ISL_2227276  | Netherlands        | 2021-Apr-20 | A/barnacle goose/Netherlands/21027357-002/2021              | Wageningen Bioveterinary Research                        | Wageningen Bioveterinary Research                   | Beerens, Nancy; Harders, Frank; Pritz-Verschuren, Sylvia; Roose, Marit; Germeraad, Evelien; Engelsma, Marc; Bossers, Alex; Heutink, Rene  |
| EPI_ISL_7053817  | Sweden             | 2021-Nov-01 | A/barnacle goose/Sweden/SVA211111SZ0376/FB004496/2021       | National Veterinary Institute, SVA                       | National Veterinary Institute                       |                                                                                                                                           |
| EPI_ISL_9160206  | Belgium            | 2021-Nov-21 | A/Anser_albifrons/Belgium/15465_0010/2021                   | Sciensano - Animal Infectious Diseases                   | Sciensano, Department of Animal Infectious Diseases | Van Borm, Steven; Roupie, Virginie; Lambrecht, Benedicte; Mathijs, Elisabeth; Steensels, Mieke                                            |
| EPI_ISL_403716   | Russian Federation | 2019-Sep-29 | A/Common_Teal/Dagestan/34d/2019                             | Research Institute of Experimental and Clinical Medicine | National Institute of Animal Health                 | Mine, J.; Uchida, Y.; Saito, T.; Shestopalov, A.; Dubovitskiy, N.; Sobolev, I.; Derko, A.; Alekseev, A.; Murashkina, T.; Sharshov, K.     |

**Table S6: Primer sequences with Illumina tag for amplification of PB2 protein region.**

|                            |                                                              |
|----------------------------|--------------------------------------------------------------|
| <b>AI-PB2-<br/>forward</b> | TCGTCGGCAGCGTCAGATGTGTATAAGAGACAGGGNCAGATGCGTG<br>ATGTGCTGG  |
| <b>AI-PB2-<br/>reverse</b> | GTCTCGTGGGCTCGGAGATGTGTATAAGAGACAGCGGTTGAACACA<br>GGGGAGTTGC |
